# Supplementary material
Source: Springer Nature journal article supplement (https://www.springermedizin.de/resource/supplementary/13058_2013_3568_MOESM5_ESM.pdf/9703656)

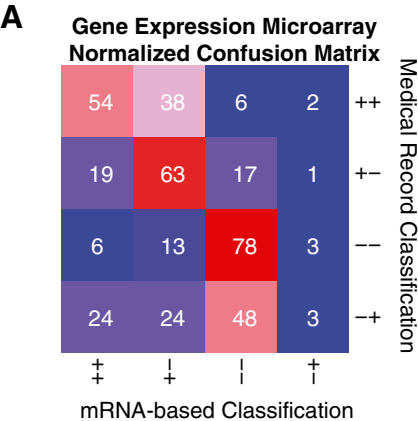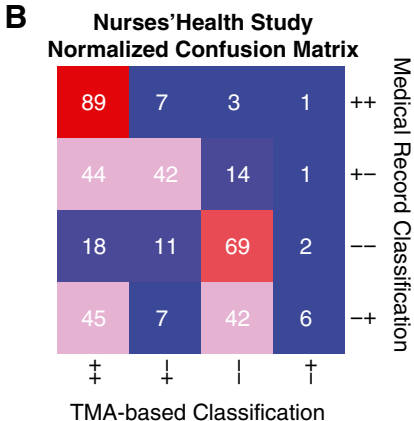

**C** Inter-assay Agreement for ER/PR Subtypes

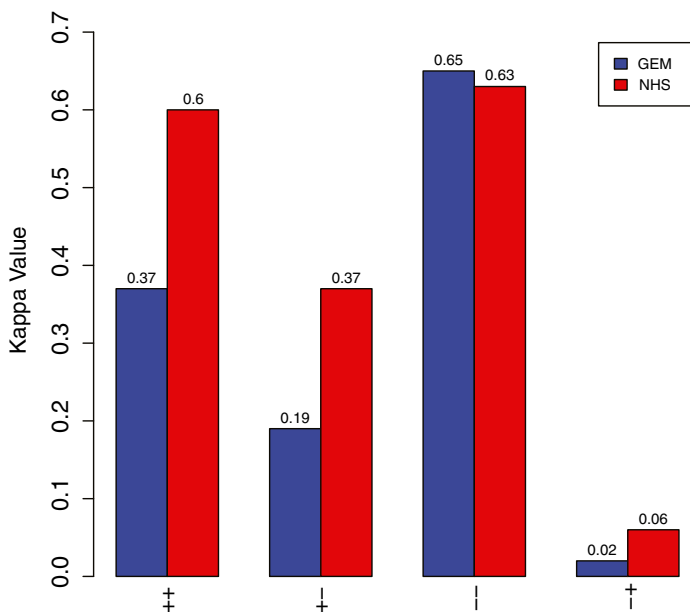

Abbreviations: ++ ER+/PR+, +- ER+/PR-, -- ER-/PR-, +- ER-/PR+

Supplement: MOESM5 [file 9703656]
